# Supplementary material for: Glucagon-like peptide-1 (GLP-1) mediates cardioprotection by remote ischaemic conditioning
Source: PubMed Central journal article supplement (PMC5157137; doi:10.1093/cvr/cvw216), 2016-10-04
Supplement: Supplementary_Table.pdf [file Supplementary_Table.pdf]

Supplementary Table

|                         | VARIABLE | Baseline | Pre-<br>ischaemia | End of<br>ischaemia | Reperfusion (min) |         |         |
|-------------------------|----------|----------|-------------------|---------------------|-------------------|---------|---------|
|                         |          |          |                   |                     | 30                | 60      | 120     |
| <i>Experiment 1</i>     |          |          |                   |                     |                   |         |         |
| Control (sham)          | MAP      | 102±13   | 103±12            | 95±7                | 86±16             | 96±13   | 82±7    |
|                         | HR       | 423±33   | 416±35            | 446±26              | 443±29            | 443±36  | 443±32  |
| Cerv.vagotomy           | MAP      | 99±15    | 98±13             | 94±19               | 99±21             | 101±22  | 93±18   |
|                         | HR       | 425±29   | 436±34            | 463±36              | 461±31            | 455±30  | 455±25  |
| Subd.vagotomy           | MAP      | 101±14   | 105±12            | 101±16              | 102±17            | 104±14  | 100±19  |
|                         | HR       | 418±38   | 423±29            | 431±30              | 435±30            | 434±29  | 437±23  |
| RIPer                   | MAP      | 104±15   | 104±14            | 91±16               | 88±10             | 93±17   | 81±13   |
|                         | HR       | 420±29   | 417±27            | 420±39              | 427±34            | 442±39  | 443±42  |
| Cerv.vagotomy<br>+RIPer | MAP      | 98±12    | 96±14             | 93±12               | 85±14             | 83±13   | 79±12   |
|                         | HR       | 417±31   | 435±37            | 462±35              | 470±35            | 458±37  | 458±34  |
| Subd.vagotomy<br>+RIPer | MAP      | 99±14    | 98±12             | 99±7                | 89±8              | 87±9    | 77±9    |
|                         | HR       | 406±29   | 463±21*           | 480±32*             | 487±38*           | 481±27* | 492±28* |
| <i>Experiment 2</i>     |          |          |                   |                     |                   |         |         |
| Control (sham)          | MAP      | 101±11   | 96±12             | 90±6                | 85±8              | 89±7    | 85±12   |
|                         | HR       | 417±37   | 421±33            | 427±37              | 433±31            | 436±27  | 435±35  |
| IPre                    | MAP      | 98±11    | 99±18             | 98±12               | 91±10             | 85±9    | 86±13   |
|                         | HR       | 432±26   | 444±16            | 438±19              | 435±22            | 441±19  | 444±22  |
| Ex(9-39)+IPre           | MAP      | 99±12    | 92±7              | 90±7                | 92±8              | 83±12   | 84±9    |
|                         | HR       | 421±28   | 427±17            | 435±12              | 432±12            | 427±15  | 420±14  |
| RIPre                   | MAP      | 100±12   | 92±10             | 98±11               | 94±11             | 97±9    | 88±13   |
|                         | HR       | 428±37   | 430±34            | 438±30              | 412±30            | 412±34  | 410±32  |
| Ex(9-39)+RIPre          | MAP      | 97±12    | 98±14             | 81±14               | 81±13             | 78±14   | 84±7    |
|                         | HR       | 415±22   | 425±31            | 434±33              | 424±35            | 431±30  | 445±18  |
| RIPer                   | MAP      | 102±15   | 96±16             | 91±9                | 78±10             | 83±17   | 81±13   |
|                         | HR       | 425±29   | 420±20            | 420±29              | 427±34            | 442±29  | 443±22  |
| Ex(9-39)+RIPer          | MAP      | 96±14    | 77±15             | 79±13               | 76±10             | 74±10   | 72±12   |
|                         | HR       | 422±32   | 407±27            | 435±31              | 436±36            | 435±31  | 445±28  |
| <i>Experiment 3</i>     |          |          |                   |                     |                   |         |         |
| Control (sham)          | MAP      | 97±11    | 97±13             | 81±19               | 80±10             | 83±13   | 89±15   |
|                         | HR       | 409±27   | 427±28            | 418±27              | 418±24            | 415±31  | 445±38  |
| Ex4                     | MAP      | 98±18    | 97±17             | 88±12               | 101±14            | 101±15  | 93±15   |
|                         | HR       | 445±26   | 446±27            | 463±25              | 462±29            | 462±32  | 478±24* |
| Vagotomy+Ex4            | MAP      | 97±9     | 125±12*           | 95±22               | 98±13             | 98±17   | 87±17   |
|                         | HR       | 428±25   | 455±35*           | 475±31*             | 486±26*           | 502±34* | 503±38* |
| Atropine+Ex4            | MAP      | 101±7    | 93±9              | 88±8                | 81±7              | 79±9    | 80±9    |
|                         | HR       | 432±15   | 431±36            | 447±29              | 447±38            | 453±33  | 450±38  |
| 4DAMP+Ex4               | MAP      | 106±13   | 111±11            | 101±13              | 107±10            | 109±11  | 108±15  |
|                         | HR       | 420±28   | 453±23            | 468±32              | 461±31            | 466±44  | 460±36  |

4DAMP – (1,1-Dimethyl-4-diphenylacetoxypiperidinium iodide); Ex(9-39) – Exendin (9-39); Ex4 – Exendin-4; HR – heart rate; IPre – ischaemic preconditioning; MAP – mean arterial blood pressure; RIPer – remote ischaemic preconditioning; RIPre – remote ischaemic preconditioning.
